# Supplementary material
Source: PubMed Central journal article supplement (PMC3408599)
Supplement: NIHMS283525-supplement-Supp_.pdf [file NIHMS283525-supplement-Supp_.pdf]

## Exclusion Criteria

|                                   |                                                                                                                                                                                                                                                                                                                                                                                                                                                                                                                                                                                                                                                                                                                                                        |
|-----------------------------------|--------------------------------------------------------------------------------------------------------------------------------------------------------------------------------------------------------------------------------------------------------------------------------------------------------------------------------------------------------------------------------------------------------------------------------------------------------------------------------------------------------------------------------------------------------------------------------------------------------------------------------------------------------------------------------------------------------------------------------------------------------|
| <b>Medical History</b>            | <ul style="list-style-type: none"> <li>• Cancer or known pre-malignant conditions, including skin cancer;</li> <li>• bladder calculus, tuberculous cystitis; neurologic disease affecting bladder function;</li> <li>• peptic ulcer disease, inflammatory bowel disease or gastrointestinal bleeding.</li> </ul>                                                                                                                                                                                                                                                                                                                                                                                                                                       |
| <b>Current Medical Conditions</b> | <ul style="list-style-type: none"> <li>• Immunocompromised condition, including treatment with immunosuppressive agents, or known positive for HIV; active tuberculosis;</li> <li>• active urethral or ureteral calculi, urethral diverticulum;</li> <li>• patients with hypertension not adequately controlled with medication;</li> <li>• unevaluated suspicious prostate exam;</li> <li>• (women only) pregnant or breastfeeding, active vaginitis.</li> </ul>                                                                                                                                                                                                                                                                                      |
| <b>Treatment History</b>          | <ul style="list-style-type: none"> <li>• Initiation of any new medications for IC/PBS or any intravesical treatment in past 4 weeks.</li> <li>• Cyclophosphamide; intravesical BCG or botulinum toxin injections for voiding symptoms in past 24 weeks; current antibiotic therapy.</li> </ul>                                                                                                                                                                                                                                                                                                                                                                                                                                                         |
| <b>Current Treatment</b>          | <ul style="list-style-type: none"> <li>• Systemic steroid treatment at any dose;</li> <li>• patient currently taking H2 blockers or proton pump inhibitors;</li> <li>• (men only) treatment for chronic bacterial prostatitis;</li> <li>• active neurostimulator.</li> </ul>                                                                                                                                                                                                                                                                                                                                                                                                                                                                           |
| <b>Procedure History</b>          | <ul style="list-style-type: none"> <li>• Pelvic radiation therapy; augmentation cystoplasty, cystectomy, or cystolysis; neurectomy;</li> <li>• treatment for genital tract dysplasia or genital warts or genital herpes;</li> <li>• hydrodistention within the past 12 weeks or urethral dilation within the past six weeks;</li> <li>• urinary incontinence surgery; other bladder or urethral surgery in past 24 weeks;</li> <li>• vaginal delivery or C-section, transvaginal surgery, hysterectomy, or prolapsed surgery in past 24 weeks;</li> <li>• TURP, TUIP, TUIBN, TUMT, TUNA, balloon dilation of the prostate, open prostatectomy or any other prostate or treatment, such as cryotherapy or thermal therapy, in past 24 weeks.</li> </ul> |
| <b>Laboratory Tests</b>           | <ul style="list-style-type: none"> <li>• abnormal PAP smear exam within the past 12 months;</li> <li>• liver function test or creatinine greater than 2x the upper limit of normal;</li> <li>• any leukopenia (absolute neutrophil count &lt;1,500/<math>\mu</math>L), thrombocytopenia (platelet count &lt;150,000/microL), or anemia (hemoglobin &lt;12 or &lt;11 g/dL in men and in women respectively.);</li> <li>• seropositive for Hepatitis B surface antigen (or Hepatitis B surface antibody if not previously vaccinated); Hepatitis C antibody, or HIV antigen or antibody;</li> <li>• positive urine culture during the past 6 weeks.</li> </ul>                                                                                           |
